# Supplementary material for: Synthesis of bifunctional Ru–Pd catalysts following a double reduction method: hydrogenation/dehydrogenation of liquid organic hydrogen carriers
Source: Royal Society of Chemistry journal article supplement (doi:10.1039/d2cy00425a), 2022-01-01
Supplement: d2cy00425a1.pdf [file d2cy00425a1.pdf]

## Supporting Information

### Synthesis of Bifunctional Ru-Pd Catalysts Following the Double Reduction Method: Hydrogenation/Dehydrogenation of Liquid Organic Hydrogen Carriers

Ting Zhu<sup>a</sup>, Ran Wang<sup>a</sup>, Ziteng Chen<sup>a</sup>, Feng Ji<sup>b</sup>, Yuan Dong<sup>a</sup>, Ming Yang<sup>a, c \*</sup>

<sup>a</sup> Sustainable Energy Laboratory, Faculty of Materials Science and Chemistry, China University of Geosciences, Wuhan 430074, China

<sup>b</sup> State Key Laboratory of Space Power-Sources Technology, Shanghai Institute of Space Power Sources, Shanghai 200245, China

<sup>c</sup> Zhejiang Institute, China University of Geosciences, Hangzhou, 311305, China

\*Corresponding authors. E-mail address: yangming8180@gmail.com (Ming Yang).

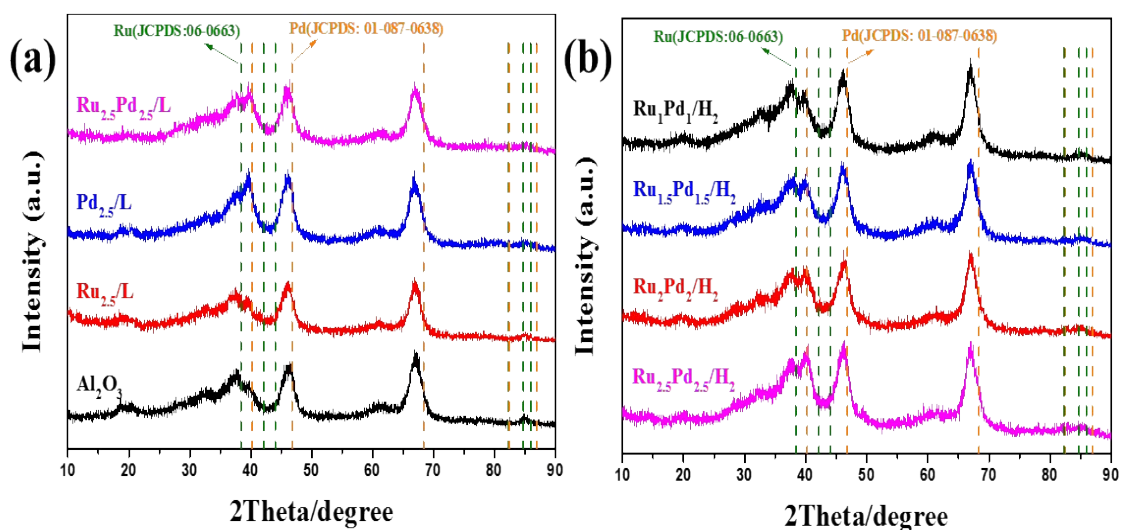

Fig. S1. (a) XRD plots recorded for the Ru<sub>2.5</sub>/L, Pd<sub>2.5</sub>/L and Ru<sub>2.5</sub>Pd<sub>2.5</sub>/L catalysts prepared following the liquid-phase reduction method; (b) XRD plots recorded for the Ru<sub>2.5</sub>Pd<sub>2.5</sub>/H<sub>2</sub>, Ru<sub>2</sub>Pd<sub>2</sub>/H<sub>2</sub>, Ru<sub>1.5</sub>Pd<sub>1.5</sub>/H<sub>2</sub>, and Ru<sub>1</sub>Pd<sub>1</sub>/H<sub>2</sub> catalysts prepared following the double reduction method.

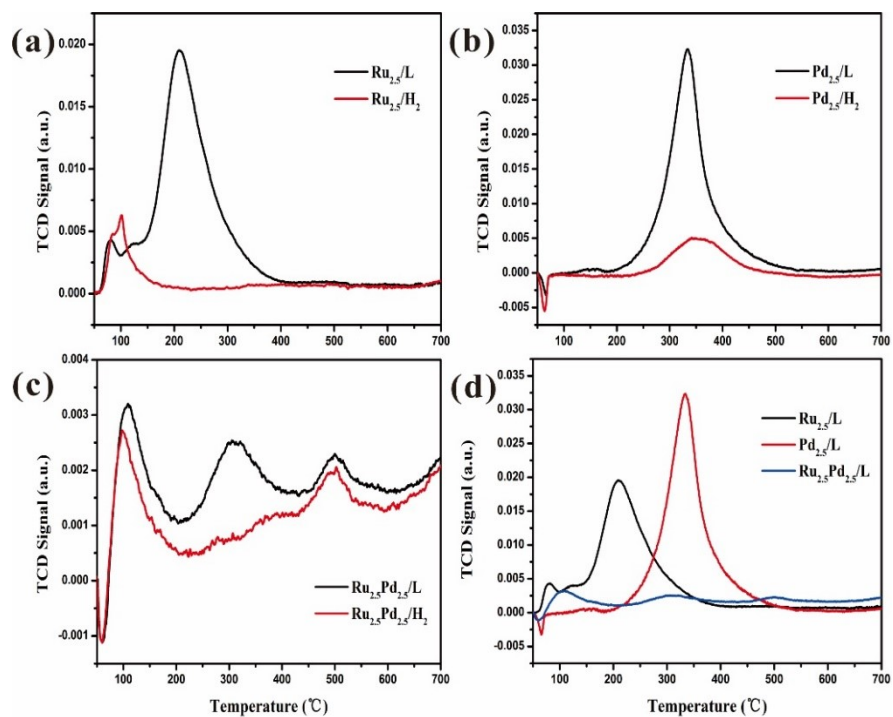

Fig. S2. H<sub>2</sub>-TPR-based comparison of catalysts prepared following the liquid-phase reduction (Ru<sub>2.5</sub>/L, Pd<sub>2.5</sub>/L, Ru<sub>2.5</sub>Pd<sub>2.5</sub>/L) and double reduction methods (Ru<sub>2.5</sub>/H<sub>2</sub>, Pd<sub>2.5</sub>/H<sub>2</sub>, Ru<sub>2.5</sub>Pd<sub>2.5</sub>/H<sub>2</sub>).

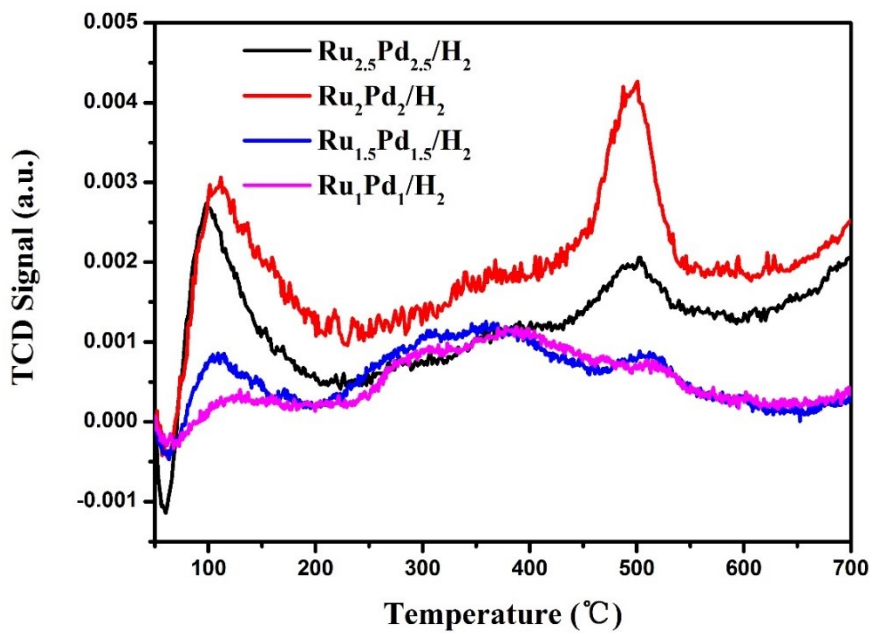

Fig. S3. H<sub>2</sub>-TPR plots recorded for the Ru<sub>2.5</sub>Pd<sub>2.5</sub>/H<sub>2</sub>, Ru<sub>2</sub>Pd<sub>2</sub>/H<sub>2</sub>, Ru<sub>1.5</sub>Pd<sub>1.5</sub>/H<sub>2</sub>, and Ru<sub>1</sub>Pd<sub>1</sub>/H<sub>2</sub> catalysts prepared following the double reduction method.

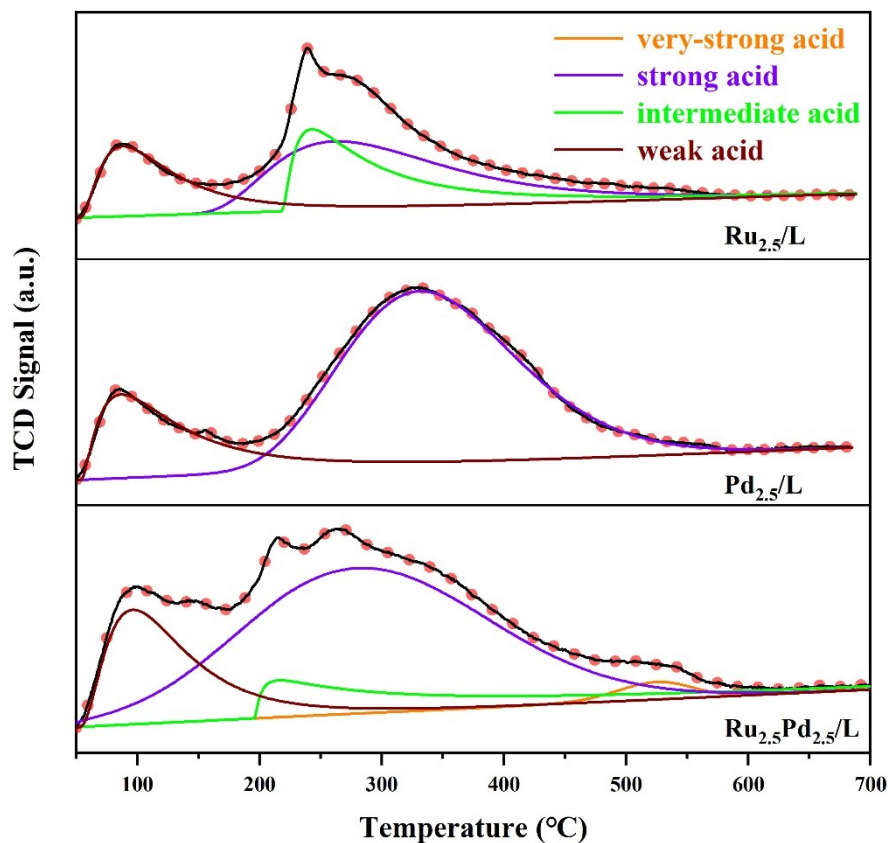

Fig. S4. NH<sub>3</sub>-TPD plots recorded for the Ru<sub>2.5</sub>/L, Pd<sub>2.5</sub>/L and Ru<sub>2.5</sub> Pd<sub>2.5</sub>/L catalysts prepared following the liquid-phase reduction method.

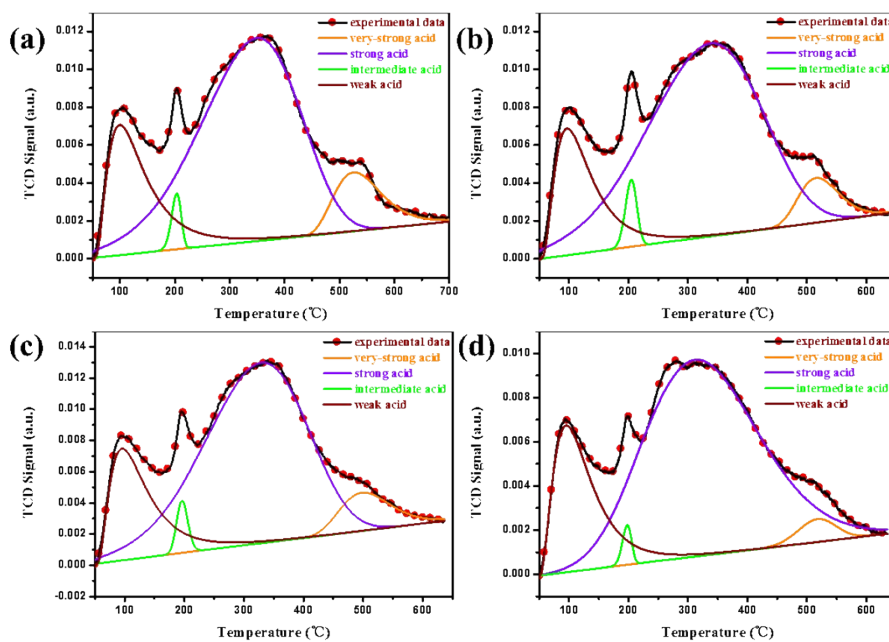

Fig. S5. NH<sub>3</sub>-TPD plots recorded for the Ru<sub>2.5</sub>Pd<sub>2.5</sub>/H<sub>2</sub>, Ru<sub>2</sub>Pd<sub>2</sub>/H<sub>2</sub>, Ru<sub>1.5</sub>Pd<sub>1.5</sub>/H<sub>2</sub>, and Ru<sub>1</sub>Pd<sub>1</sub>/H<sub>2</sub> catalysts prepared following the double reduction method.

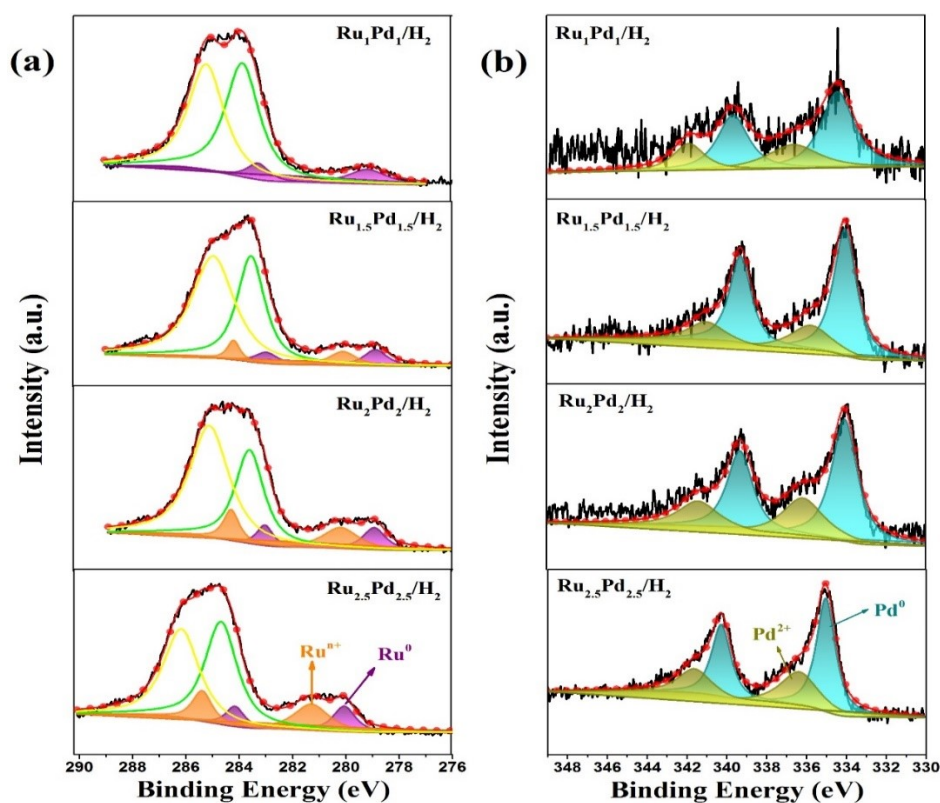

**Fig. S6.** (a) Plot of the Ru 3d core level fitting peaks obtained using the XPS technique for the  $\text{Ru}_{2.5}\text{Pd}_{2.5}/\text{H}_2$ ,  $\text{Ru}_2\text{Pd}_2/\text{H}_2$ ,  $\text{Ru}_{1.5}\text{Pd}_{1.5}/\text{H}_2$ , and  $\text{Ru}_1\text{Pd}_1/\text{H}_2$ ; (b) Plot of the Pd 3d core level fitting peaks obtained using the XPS technique for  $\text{Ru}_{2.5}\text{Pd}_{2.5}/\text{H}_2$ ,  $\text{Ru}_2\text{Pd}_2/\text{H}_2$ ,  $\text{Ru}_{1.5}\text{Pd}_{1.5}/\text{H}_2$ , and  $\text{Ru}_1\text{Pd}_1/\text{H}_2$ .

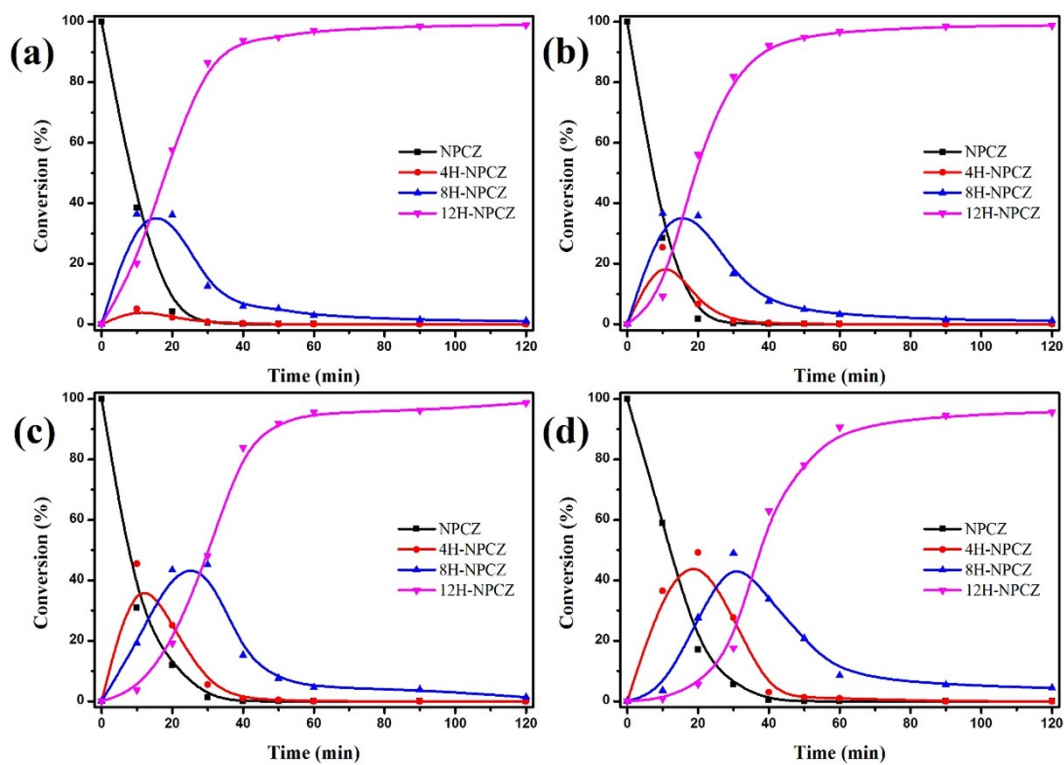

**Fig. S7.** Time-dependent product distribution recorded for NPCZ hydrogenation with different catalysts: (a)  $\text{Ru}_{2.5}\text{Pd}_{2.5}/\text{H}_2$ , (b)  $\text{Ru}_2\text{Pd}_2/\text{H}_2$ , (c)  $\text{Ru}_{1.5}\text{Pd}_{1.5}/\text{H}_2$ , and (d)  $\text{Ru}_1\text{Pd}_1/\text{H}_2$ .



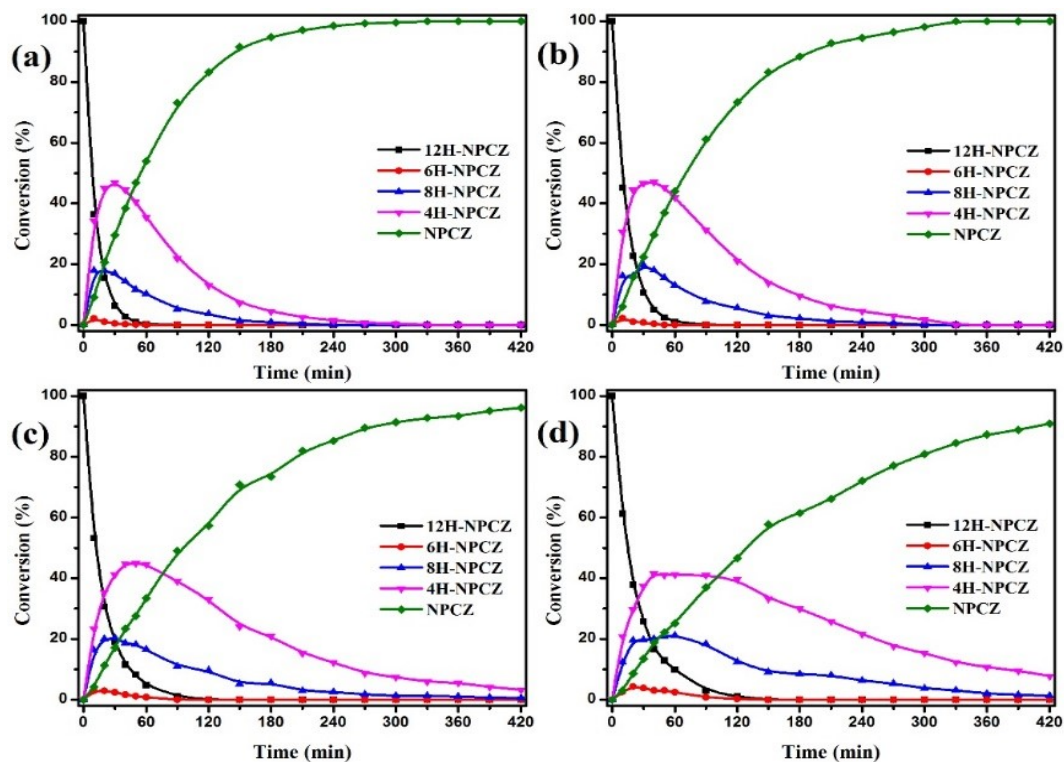

Fig. S8. Time-dependent product distribution recorded for 12H-NPCZ dehydrogenation with different catalysts: (a)  $\text{Ru}_{2.5}\text{Pd}_{2.5}/\text{H}_2$ , (b)  $\text{Ru}_2\text{Pd}_2/\text{H}_2$ , (c)  $\text{Ru}_{1.5}\text{Pd}_{1.5}/\text{H}_2$ , and (d)  $\text{Ru}_1\text{Pd}_1/\text{H}_2$ .

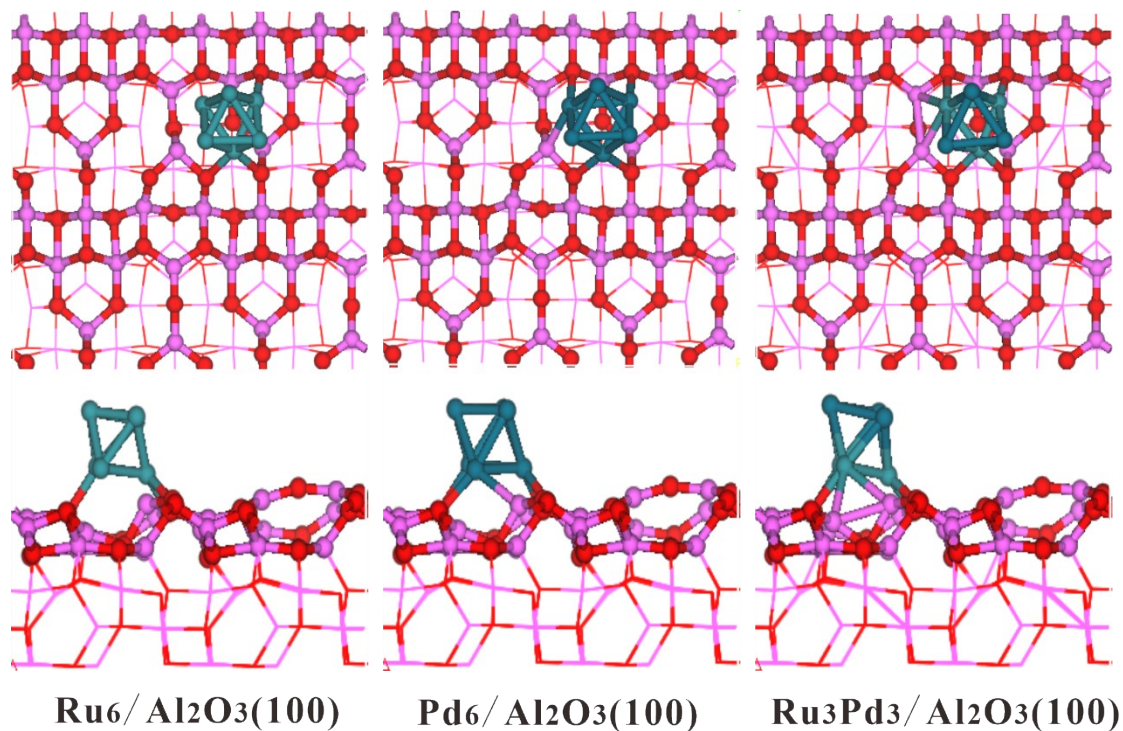

Fig. S9. Top and side view of the configurations of  $\text{Ru}_6/\text{Al}_2\text{O}_3(100)$ ,  $\text{Pd}_6/\text{Al}_2\text{O}_3(100)$ , and  $\text{Ru}_3\text{Pd}_3/\text{Al}_2\text{O}_3(100)$ ; dark green, light green, pink and red balls represent the Pd, Ru, Al and O atoms, respectively.

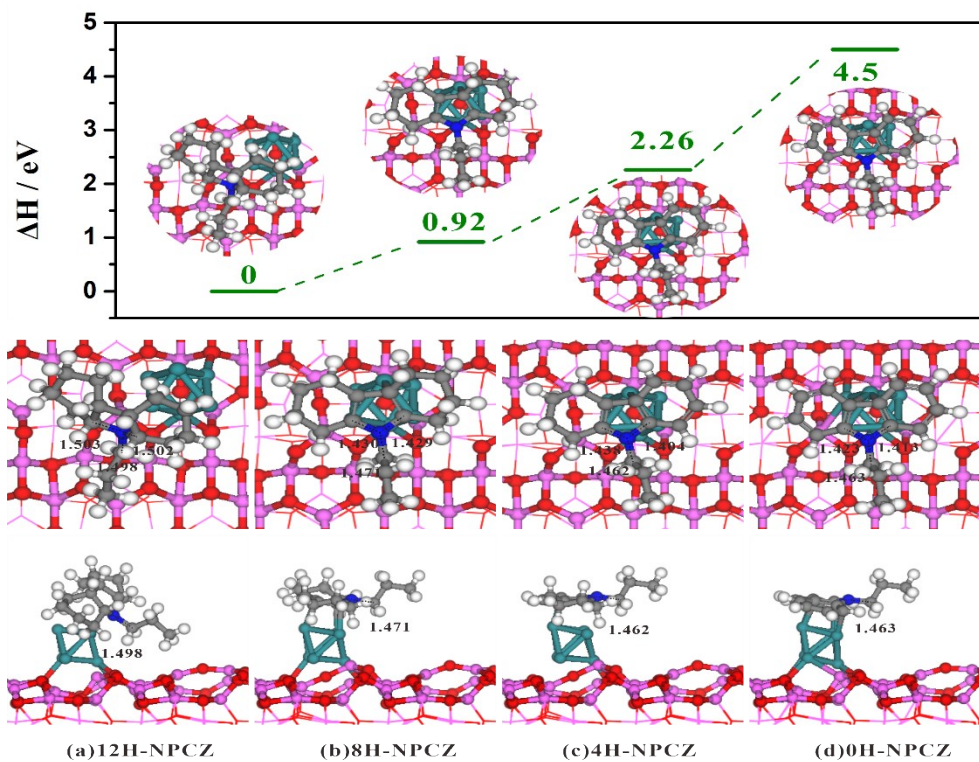

**Fig. S10.** Energy profile from 12H-NPCZ→8H-NPCZ→4H-NPCZ→NPCZ on Ru<sub>6</sub>/Al<sub>2</sub>O<sub>3</sub>(100) surface; light green, pink, red, white and blue balls represent the Ru, Al, O, H, and N atoms, respectively.

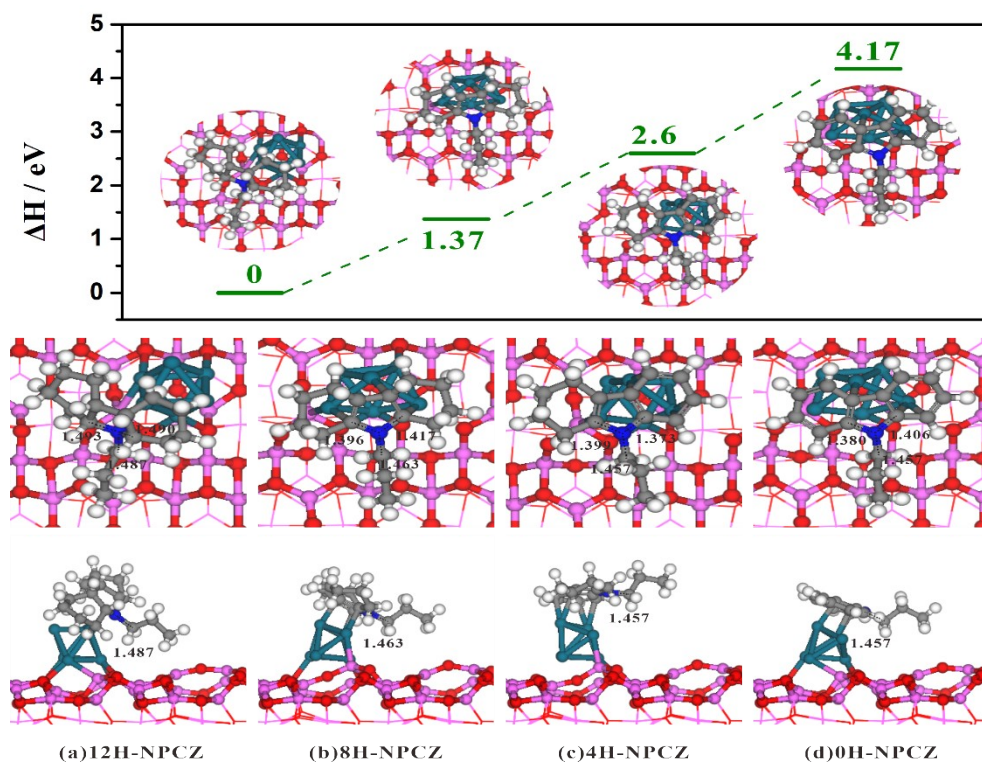

**Fig. S11.** Energy profile recorded for 12H-NPCZ→8H-NPCZ→4H-NPCZ→NPCZ on Pd<sub>6</sub>/Al<sub>2</sub>O<sub>3</sub>(100) surface; dark green, pink, red, white, and blue balls represent the Pd, Al, O, H, and N atoms, respectively.

**Table S1.** Acid characteristic of catalysts in this article.

|                                                     | Total <sup>b</sup> | Acidity [ $\mu\text{mol}\cdot\text{g}^{-1}$ ] <sup>a</sup> |                  |                  |                    | Acid site density [site $\text{nm}^{-2}$ ] <sup>d</sup> |                  |                  |                    |
|-----------------------------------------------------|--------------------|------------------------------------------------------------|------------------|------------------|--------------------|---------------------------------------------------------|------------------|------------------|--------------------|
|                                                     |                    | Wea <sup>c</sup>                                           | Int <sup>c</sup> | Str <sup>c</sup> | V-str <sup>c</sup> | Wea <sup>d</sup>                                        | Int <sup>d</sup> | Str <sup>d</sup> | V-str <sup>d</sup> |
| Ru <sub>2.5</sub> /L                                | 942.37             | 220.04<br>88 °C                                            | 280.95<br>242 °C | 441.38<br>261 °C | —                  | 0.74                                                    | 0.94             | 1.48             | —                  |
| Pd <sub>2.5</sub> /L                                | 1128.69            | 244.01<br>86 °C                                            | —                | 884.68<br>330 °C | —                  | 0.75                                                    | —                | 2.70             | —                  |
| Ru <sub>2.5</sub> Pd <sub>2.5</sub> /L              | 1154.70            | 233.96<br>96 °C                                            | 131.43<br>215 °C | 758.98<br>280 °C | 30.33<br>524 °C    | 0.55                                                    | 0.31             | 1.78             | 0.07               |
| Ru <sub>2.5</sub> Pd <sub>2.5</sub> /H <sub>2</sub> | 974.94             | 193.84<br>99 °C                                            | 20.06<br>203 °C  | 663.64<br>349 °C | 97.40<br>525 °C    | 0.54                                                    | 0.056            | 1.84             | 0.27               |
| Ru <sub>2</sub> Pd <sub>2</sub> /H <sub>2</sub>     | 919.86             | 165.79<br>96 °C                                            | 26.12<br>204 °C  | 670.52<br>338 °C | 57.43<br>515 °C    | 0.52                                                    | 0.082            | 2.10             | 0.18               |
| Ru <sub>1.5</sub> Pd <sub>1.5</sub> /H <sub>2</sub> | 844.40             | 162.31<br>95 °C                                            | 21.41<br>196 °C  | 595.44<br>329 °C | 65.24<br>498 °C    | 0.50                                                    | 0.067            | 1.85             | 0.20               |
| Ru <sub>1</sub> Pd <sub>1</sub> /H <sub>2</sub>     | 833.80             | 177.93<br>95 °C                                            | 12.43<br>197 °C  | 617.62<br>311 °C | 25.82<br>517 °C    | 0.46                                                    | 0.032            | 1.60             | 0.07               |

[a] [b] [c] The value of acidity obtained by NH<sub>3</sub>-TPD quantification experiments.

[c] The value in brackets represents the temperature at the center of ammonia desorption peak.

[d] Surface density of the acid site.

**Table S2.** Bind energy of Ru3d and Pd3d core-level obtained by XPS experiments.

|                                                     | Binding Energy (eV)               |                                    |                                   |                                    | Contribution<br>of Pd <sup>0</sup> (%) | Contribution<br>of Ru <sup>0</sup> (%) |
|-----------------------------------------------------|-----------------------------------|------------------------------------|-----------------------------------|------------------------------------|----------------------------------------|----------------------------------------|
|                                                     | Ru <sup>0</sup> 3d <sub>5/2</sub> | Ru <sup>n+</sup> 3d <sub>5/2</sub> | Pd <sup>0</sup> 3d <sub>5/2</sub> | Pd <sup>2+</sup> 3d <sub>5/2</sub> |                                        |                                        |
| Ru <sub>2.5</sub> Pd <sub>2.5</sub> /H <sub>2</sub> | 280.07                            | 281.30                             | 335.04                            | 336.38                             | 63.68                                  | 38.55                                  |
| Ru <sub>2</sub> Pd <sub>2</sub> /H <sub>2</sub>     | 278.91                            | 280.18                             | 334.05                            | 336.16                             | 67.05                                  | 39.95                                  |
| Ru <sub>1.5</sub> Pd <sub>1.5</sub> /H <sub>2</sub> | 278.86                            | 280.08                             | 334.03                            | 335.75                             | 74.79                                  | 50.41                                  |
| Ru <sub>1</sub> Pd <sub>1</sub> /H <sub>2</sub>     | 279.18                            | —                                  | 334.38                            | 336.59                             | 65.10                                  | 100                                    |

**Table S3.** Selectivity of reaction species of NPCZ to 12H-NPCZ and H<sub>2</sub>-uptake amount over different catalysts in 30 min at 150 °C and pressure of 7 MPa H<sub>2</sub>.

| Catalysts                                           | Conversion % |         | Selection % |          | H <sub>2</sub> -Uptake |
|-----------------------------------------------------|--------------|---------|-------------|----------|------------------------|
|                                                     | NPCZ         | 4H-NPCZ | 8H-NPCZ     | 12H-NPCZ | wt%                    |
| Ru <sub>2.5</sub> /L                                | 81.285       | 16.741  | 44.565      | 19.979   | 3.04                   |
| Ru <sub>2.5</sub> /H <sub>2</sub>                   | 85.241       | 13.976  | 43.247      | 28.018   | 3.38                   |
| Ru <sub>2.5</sub> Pd <sub>2.5</sub> /L              | 100          | 0       | 7.469       | 92.531   | 5.30                   |
| Ru <sub>2.5</sub> Pd <sub>2.5</sub> /H <sub>2</sub> | 99.621       | 0.69    | 12.477      | 86.454   | 5.17                   |
| Ru <sub>2</sub> Pd <sub>2</sub> /H <sub>2</sub>     | 99.696       | 1.075   | 16.709      | 81.912   | 5.08                   |
| Ru <sub>1.5</sub> Pd <sub>1.5</sub> /H <sub>2</sub> | 98.702       | 5.486   | 45.095      | 48.121   | 4.38                   |
| Ru <sub>1</sub> Pd <sub>1</sub> /H <sub>2</sub>     | 94.526       | 27.615  | 48.948      | 17.963   | 3.30                   |

**Table S4.** Selectivity of reaction species of 12H-NPCZ to NPCZ and H<sub>2</sub>-release amount over different catalysts in 60 min at 190 °C.

| Catalysts                                           | Conversion % |         | Selection % |         |        | H <sub>2</sub> -Release |
|-----------------------------------------------------|--------------|---------|-------------|---------|--------|-------------------------|
|                                                     | 12H-NPCZ     | 8H-NPCZ | 6H-NPCZ     | 4H-NPCZ | NPCZ   | wt%                     |
| Pd <sub>2.5</sub> /L                                | 99.770       | 4.102   | 0           | 53.758  | 41.910 | 4.26                    |
| Pd <sub>2.5</sub> /H <sub>2</sub>                   | 100          | 1.901   | 0           | 44.222  | 53.877 | 4.53                    |
| Ru <sub>2.5</sub> Pd <sub>2.5</sub> /L              | 94.483       | 12.003  | 1.528       | 42.003  | 39.309 | 3.86                    |
| Ru <sub>2.5</sub> Pd <sub>2.5</sub> /H <sub>2</sub> | 99.731       | 10.278  | 0           | 35.5    | 53.953 | 4.37                    |
| Ru <sub>2</sub> Pd <sub>2</sub> /H <sub>2</sub>     | 98.974       | 13.069  | 0           | 41.888  | 44.017 | 4.11                    |
| Ru <sub>1.5</sub> Pd <sub>1.5</sub> /H <sub>2</sub> | 95.299       | 16.466  | 0.778       | 44.634  | 33.421 | 3.71                    |
| Ru <sub>1</sub> Pd <sub>1</sub> /H <sub>2</sub>     | 90.066       | 21.160  | 2.474       | 41.258  | 25.174 | 3.23                    |



**Table S5.** Key structural parameters and adsorption energy ( $E_{\text{ads}}$ , eV) of 12H-NPCZ, 8H-NPCZ, 4H-NPCZ, and NPCZ on the  $\text{Ru}_6/\text{Al}_2\text{O}_3(100)$ ,  $\text{Pd}_6/\text{Al}_2\text{O}_3(100)$ , and  $\text{Ru}_3\text{Pd}_3/\text{Al}_2\text{O}_3(100)$  surfaces.

| Surfaces                                                | Species  | Adsorption/configuration | $E_{\text{ads}}$               | C-N Bonding length (Å) |       |       |       |
|---------------------------------------------------------|----------|--------------------------|--------------------------------|------------------------|-------|-------|-------|
|                                                         |          |                          | (eV)                           | C3-N                   | C13-N | C4-N  |       |
| (a) $\text{Ru}_6/\text{Al}_2\text{O}_3(100)$            | 12H-NPCZ |                          | -0.32                          | 1.503                  | 1.498 | 1.502 |       |
|                                                         | 8H-NPCZ  | $\text{Ru}_3$            | $\text{T}_{\text{Ru}}$ : via C | -1.01                  | 1.430 | 1.471 | 1.429 |
|                                                         | 4H-NPCZ  |                          | $\text{T}_{\text{Ru}}$ : via C | -1.22                  | 1.438 | 1.462 | 1.404 |
|                                                         | NPCZ     |                          | $\text{T}_{\text{Ru}}$ : via C | -0.73                  | 1.423 | 1.463 | 1.413 |
| (b) $\text{Ru}_3\text{Pd}_3/\text{Al}_2\text{O}_3(100)$ | 12H-NPCZ |                          | $\text{T}_{\text{Ru}}$ : via N | -1.37                  | 1.500 | 1.499 | 1.496 |
|                                                         | 8H-NPCZ  | $\text{Ru}_3$            | $\text{T}_{\text{Ru}}$ : via C | -1.23                  | 1.424 | 1.466 | 1.447 |
|                                                         | 4H-NPCZ  |                          | $\text{T}_{\text{Ru}}$ : via C | -1.36                  | 1.456 | 1.463 | 1.366 |
|                                                         | NPCZ     |                          | $\text{T}_{\text{Ru}}$ : via C | -1.33                  | 1.419 | 1.463 | 1.418 |
| (c) $\text{Pd}_6/\text{Al}_2\text{O}_3(100)$            | 12H-NPCZ |                          | -0.95                          | 1.503                  | 1.498 | 1.502 |       |
|                                                         | 8H-NPCZ  | $\text{Pd}_3$            | $\text{T}_{\text{Ru}}$ : via C | -0.12                  | 1.430 | 1.471 | 1.429 |
|                                                         | 4H-NPCZ  |                          | $\text{T}_{\text{Ru}}$ : via C | -1.09                  | 1.438 | 1.462 | 1.404 |
|                                                         | NPCZ     |                          | $\text{T}_{\text{Ru}}$ : via C | -0.48                  | 1.423 | 1.463 | 1.413 |
